# Supplementary material
Source: PubMed Central journal article supplement (PMC5948960)
Supplement: pnas.1717070115.sapp.pdf [file pnas.1717070115.sapp.pdf]

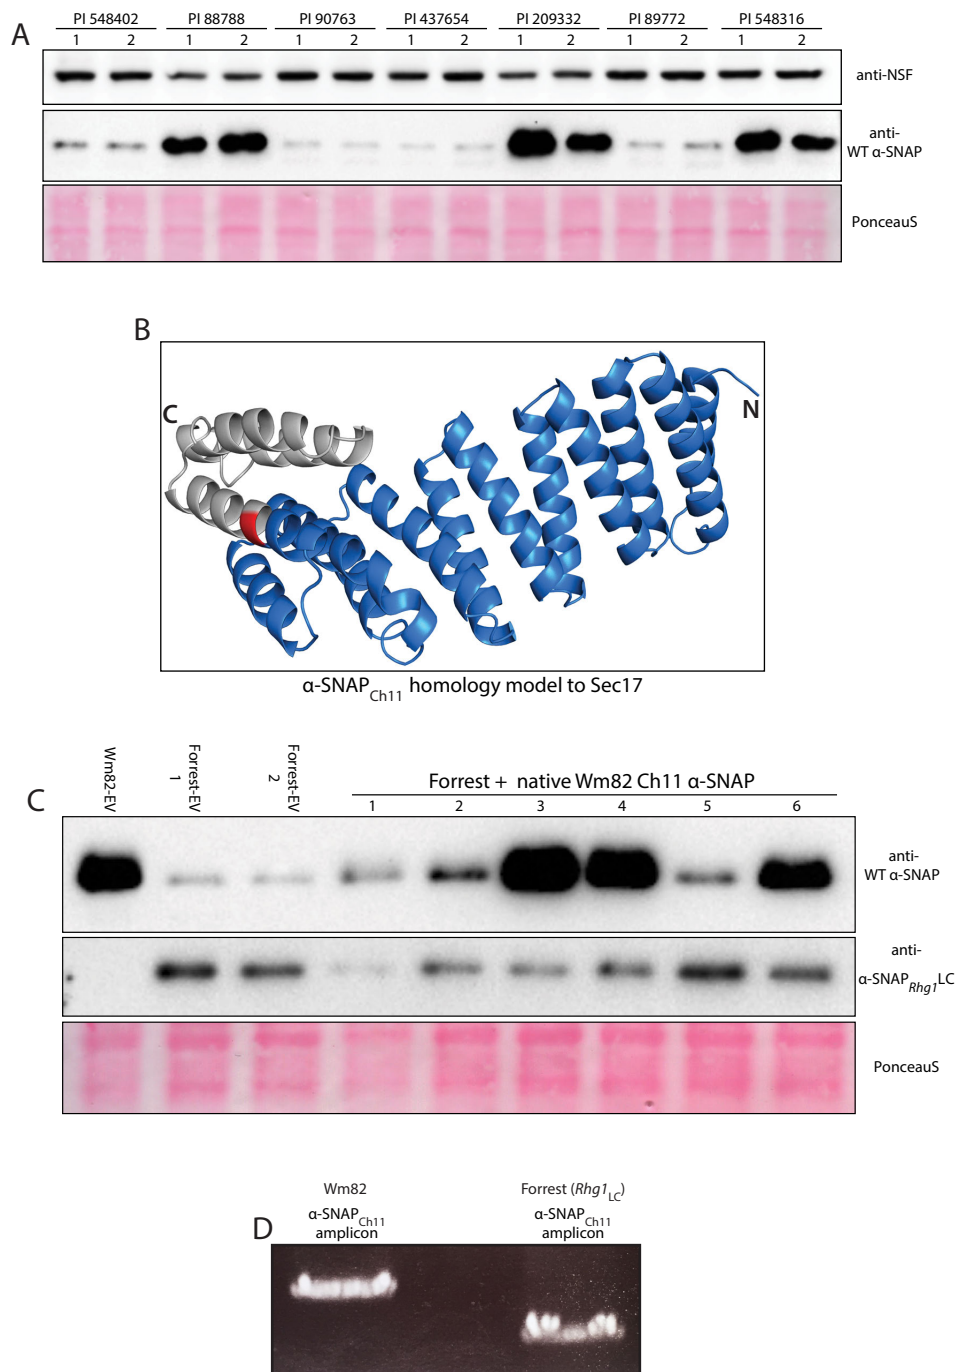

Fig. S1. Wild-type  $\alpha$ -SNAP expression is reduced in *Rhg1<sub>Low Copy</sub>* soybeans. (A) Independent immunoblot like Fig. 1B and incorporated into NSF densitometric analyses shown in Fig. 1C. Immunoblot of wild-type  $\alpha$ -SNAPs and NSF expression in HG-Type soybean roots. *Rhg1<sub>LC</sub>* varieties: PI 548402 (Peking), PI 89772, PI 437654, PI 90763; *Rhg1<sub>HC</sub>* varieties: PI 88788, PI 209332, PI 548316 (7 copy). PonceauS staining shows total protein loaded per lane. (B) Modeling of  $\alpha$ -SNAP<sub>Ch11</sub> to Sec17 crystal structure (yeast  $\alpha$ -SNAP, PDB ID 1QQE) suggests early termination of alpha-helix 12 in the intron-retention mutant. Pre-mature translational termination point shown red. (C) Immunoblots for total WT  $\alpha$ -SNAP and  $\alpha$ -SNAP<sub>Rhg1<sup>LC</sup></sub> levels in Forrest (*Rhg1<sub>LC</sub>*) transgenic roots transformed with the native WT  $\alpha$ -SNAP<sub>Ch11</sub> locus from Wm82 or an EV (empty vector) control. (D) Agarose gel showing PCR amplicons of the promoter regions of the  $\alpha$ -SNAP<sub>Ch11</sub>-IR allele or the WT  $\alpha$ -SNAP<sub>Ch11</sub> allele from Wm82.

NSF RAN07 alignment to Wild-Type NSF<sub>ch07</sub> (Wm82)

A

Wms82 MASRFGLSSSSSSASSMRVNTNPASDLALTNLAF CSPDLRNFVAVPGHNNLYLAAVADSF  
RAN07 MASQFGLSSSSSSASSMRVYTPANDLALTNLAF CSPDLRNFVAVPGHNNLYLAAVADSF  
\*\*\*:\*\*\*\*\* \*\*.\*\*\*\*\*\*  
  
Wms82 VLSLSAHDTIGSGQIALNAVQRRC AKVSSGDSVQVSRFVPPEDFNLLLTLELEF VKKGS  
RAN07 VLSLSAHDTIGSGQIALNAVQRRC AKVSSGDSVQVSRFVPPEDFNLLLTLELEF FVKKGS  
\*\*\*\*\*  
  
Wms82 KSEQIDAVLLAKQLRKR FMNQVMTVGQKVLFEYHGNNYSFTVSNAAVEGQEKSNSLERGM  
RAN07 KSEQIDAVLLAKQLRKR FMNQVMTVGQKVLFEYHGNNYSFTVSNAAVEGQEKSNSLERGI  
\*\*\*\*\*:  
  
Wms82 ISDDTYIVFETS RDSGIKIVNQREGATSNI FKQKEFNLSLIGIGGLSAEFADIFRRAFAS  
RAN07 ISDDTYIVFETS RDSGIKIVNQREGATSNI FKQKEFNLSLIGIGGLSAEFADIFRRAFAS  
\*\*\*\*\*  
  
Wms82 RVFPPHVTSKLG IKHVKGMLLYGPPGTGKTLMARQIGKILNGKEPKIVNGPEVLSKFVGE  
RAN07 RVFPPHVTSKLG IKHVKGMLLYGPPGTGKTLMARQIGKILNGKEPKIVNGPEVLSKFVGE  
\*\*\*\*\*  
  
Wms82 TEKNVRDLFADAEQDQRTRGDESDLHVIIFDEIDAICKSRGSTRDGTGVHDSIVNQLLTK  
RAN07 TEKNVRDLFADAEQDQRTRGDESDLHVIIFDEIDAICKSRGSTRDGTGVHDSIVNQLLTK  
\*\*\*\*\*  
  
Wms82 IDGVESLNNVLLIGMTNRKDMLDEALLRPGRLEVQVEISLPDENGRLQILQIHTNKMKEN  
RAN07 IDGVESLNNVLLIGMTNRKDMLDEALLRPGRLEVQVEISLPDENGRLQILQIHTNKMKEN  
\*\*\*\*\*  
  
Wms82 SFLAADVNLQELAA RTKNYSGAELEGVVKSAVS YALNRQLSLEDLTKPVEEENIKVTMDD  
RAN07 SFLAADVNLQELAA RTKNYSGAELEGVVKSAVS YALNRQLSLEDLTKPVEEENIKVTMDD  
\*\*\*\*\*  
  
Wms82 FLNALHEVTS AFGASTDDLERCRLHGMVECGDRHKHIYQRAMLLVEQVKVSKGSPLVTCL  
RAN07 FLNALHEVTS AFGASTDDLERCRLHGMVECGDRHKHIYQRAMLLVEQVKVSKGSPLVTCL  
\*\*\*\*\*  
  
Wms82 LEGSRGSGKTALSATV GIDSDFPYVKIVSAESMIGLHESTKCAQI IKVFEDAYKSPLSVI  
RAN07 LEGSRGSGKTALSATV GIDSDFPYVKIVSAESMIGLHESTKCAQI IKVFEDAYKSPLSVI  
\*\*\*\*\*  
  
Wms82 ILDDIERLLEYVPIGPRFSNLISQ TLLVLLKRLPPKGKLMVIGTTSELDFLESIGFCDT  
RAN07 ILDDIERLLEYVPIGPRFSNLISQ TLLVLLKRLPPKGKLMVIGTTSELDFLESIGFCDT  
\*\*\*\*\*  
  
Wms82 FSVTYHIPTLNTTDAKKVLEQLNVFTDEDIDSAAEALNDMP IRKLYMLIEMAAQGEHGGG  
RAN07 FSVTYHIPTLNTTDAKKVLEQLNVFTDEDIDSAAEALNDMP IRKLYMLIEMAAQGEHGGG  
\*\*\*\*\*  
  
Wms82 AEAFSGKEKISIAHFYDCLQDVVRL  
RAN07 AEAFSGKEKISIAHFYDCLQDVVRL  
\*\*\*\*\*

B

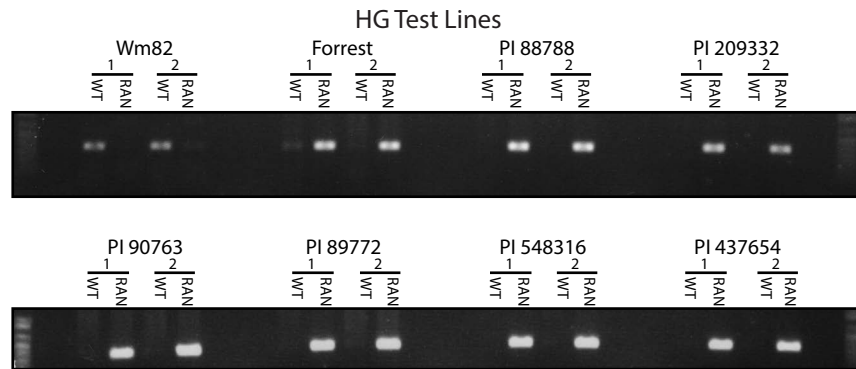

C

| Gene                   | Young leaf | Flower | One cm pod | Pod shell 10DAF | Pod shell 14DAF | Seed 10DAF | Seed 14DAF | Seed 21DAF | Seed 25DAF | Seed 28DAF | Seed 35DAF | Seed 42DAF | Root | Nodule |
|------------------------|------------|--------|------------|-----------------|-----------------|------------|------------|------------|------------|------------|------------|------------|------|--------|
| <i>Glyma.07G195900</i> | 5          | 8      | 8          | 9               | 9               | 3          | 4          | 6          | 5          | 2          | 4          | 2          | 11   | 7      |
| <i>Glyma.13G180100</i> | 6          | 6      | 8          | 6               | 5               | 3          | 4          | 3          | 2          | 1          | 3          | 1          | 12   | 7      |

Normalized RNA-seq reads from Wm82 (soybase.org)

Fig. S2. The  $NSF_{RAN07}$  allele is present within all examined *Rhg1* HG-Type test lines. (A)  $NSF_{RAN07}$  amino acid alignment with  $NSF_{Ch07}$  of soybean reference genome Williams 82 (Wm82). N-domain amino acid polymorphisms unique to  $NSF_{RAN07}$  shown red. Corresponding residues of Wm82 encoded  $NSF_{Ch07}$  (wild-type) shown boldface. (B) Agarose gel showing PCR amplicons generated with  $NSF_{RAN07}$  (RAN) or  $NSF_{Ch07}$  WT (WT) allele specific primers on the HG-Type soybeans or soybean Wm82. (C) Wm82 normalized RNA-seq reads for both  $NSF_{Ch07}$  and  $NSF_{Ch13}$  across soybean tissues. RNA-seq data from Severin *et al* (1) and this RNA-seq atlas data is publically available at Soybase.org. DAF: days after fertilization.

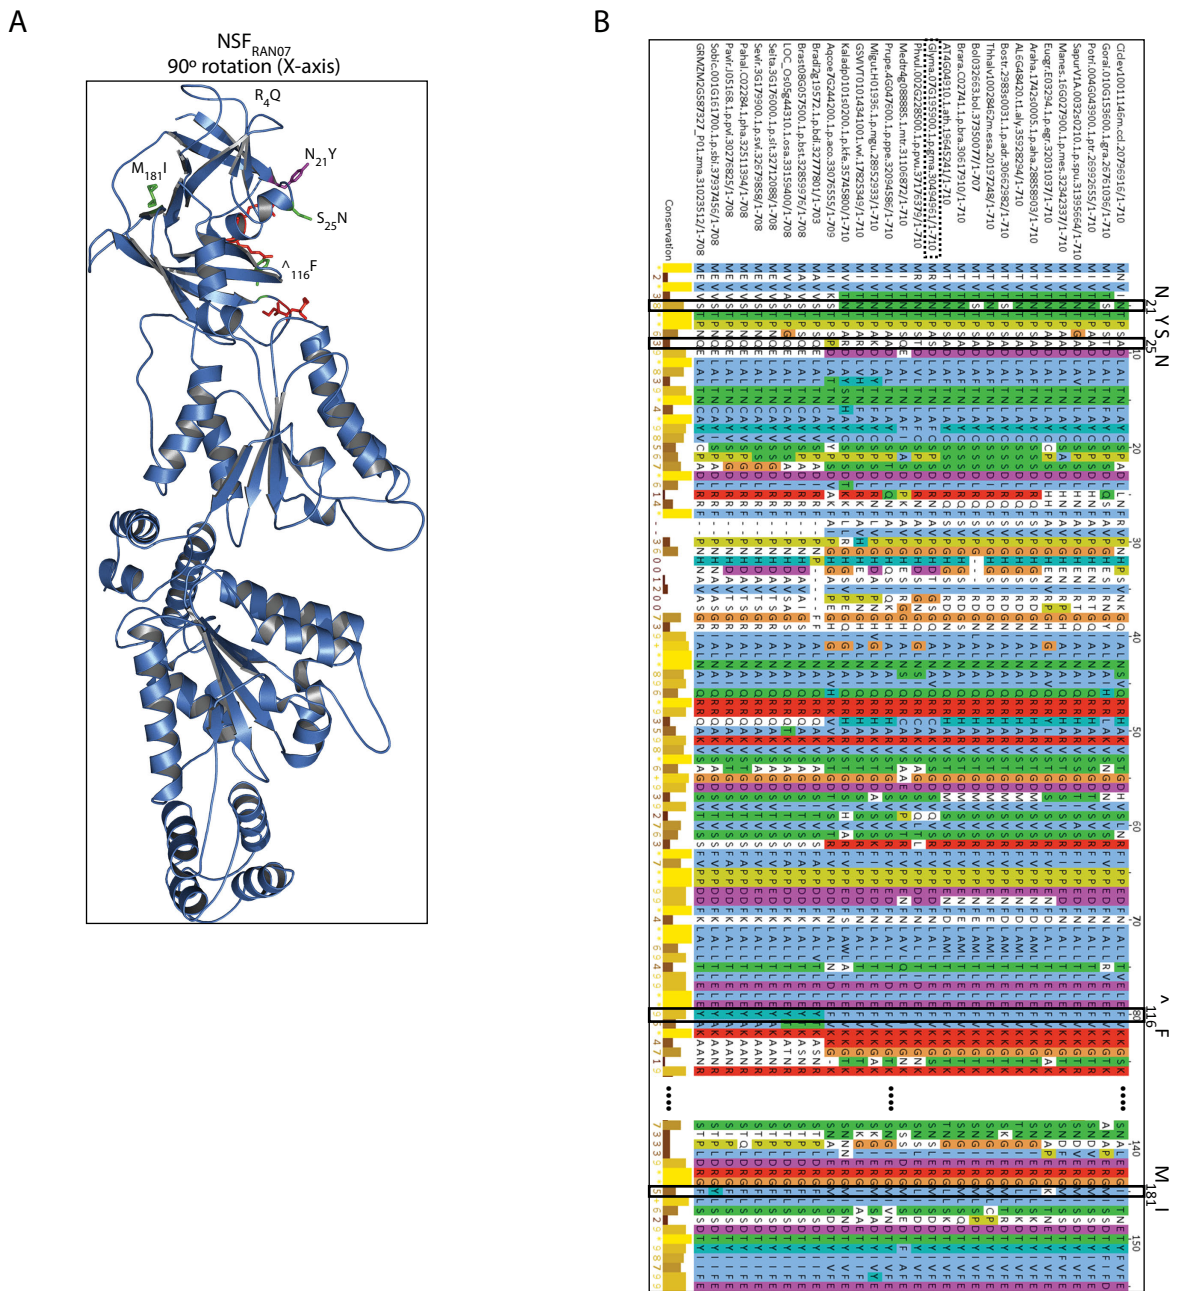

Fig. S3. (A) NSF<sub>RAN07</sub> modeled to NSF<sub>CHO</sub> cryo-EM structure as in Fig. 2A, but rotated 90° on X-axis relative to Fig. 2B. NSF residue patches implicated in  $\alpha$ -SNAP binding colored red and labeled I, II or III, respectively. (B) Alignment of NSF N-domain using available plant NSF amino acid sequences from Phytozome.org (2). Alignment generated with Jalview starting at a conserved methionine residue corresponding to NSF<sub>RAN07</sub> methionine 17. Residues polymorphic in NSF<sub>RAN07</sub> are outlined with a box with the corresponding NSF<sub>RAN07</sub> polymorphism/position labeled above. "....." indicates a gap of residues not polymorphic in NSF<sub>RAN07</sub>.

**A**

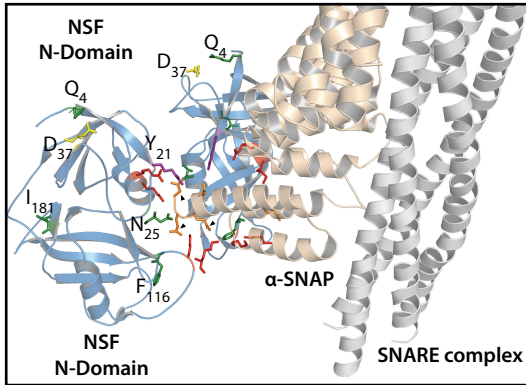

**B**

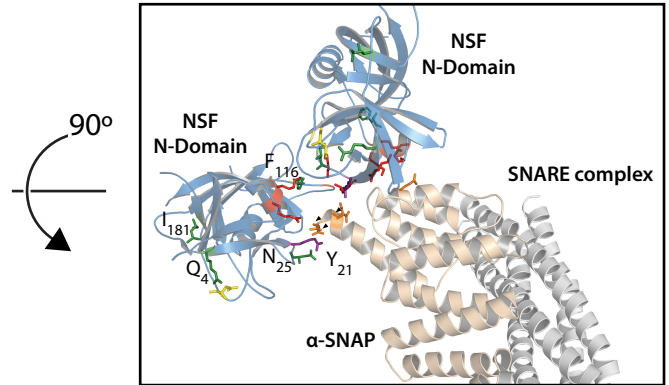

**C**

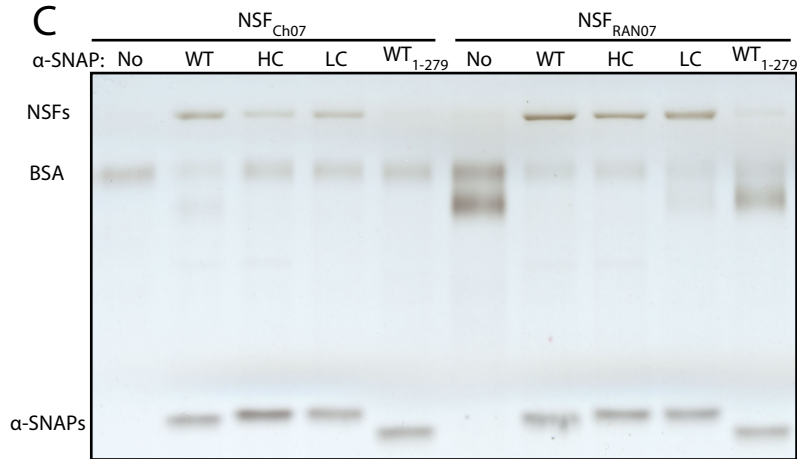

**D**

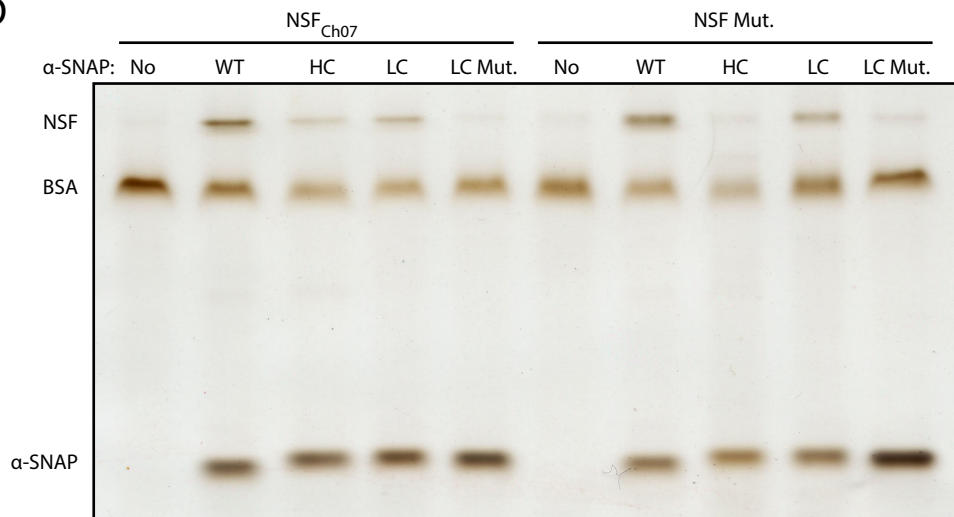

E

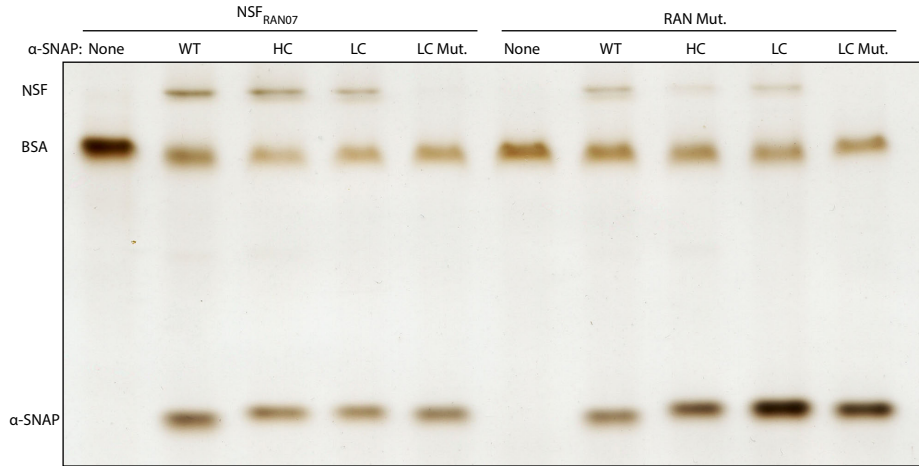

Fig. S4. NSF<sub>RAN07</sub> polymorphisms are at the  $\alpha$ -SNAP binding interface. NSF<sub>RAN07</sub> and NSF<sub>Ch07</sub> binding with  $\alpha$ -SNAP is dependent on  $\alpha$ -SNAP C-terminal polymorphisms, and two NSF<sub>RAN07</sub> polymorphisms enhance binding by *Rhg1* resistance type  $\alpha$ -SNAPs. (A) Like Fig. 2C, cryo-EM structure of mammalian 20S supercomplex showing SNARE bundle (white), one  $\alpha$ -SNAP (yellow) and two NSF N-domains (light blue). Conserved NSF N-domain patches (R<sub>10</sub>; RK<sub>67-68</sub>; KK<sub>104-105</sub>) shown red,  $\alpha$ -SNAP C-terminal contacts (D<sub>217</sub>DEED<sub>290-293</sub>) shown orange and  $\alpha$ -SNAP residues corresponding to *Rhg1* polymorphisms indicated by black arrows, NSF<sub>RAN07</sub> polymorphisms (R<sub>4</sub>Q, S<sub>25</sub>N,  $\wedge$ <sub>116</sub>F, M<sub>181</sub>I,  $\wedge$ =insertion) colored green, except polymorphisms N<sub>21</sub>Y colored in purple. NSF<sub>RAN07</sub> polymorphism R<sub>4</sub>Q positions near an acidic residue D<sub>37</sub> (shown yellow). (B) Same as A, but rotated 90° on Y-axis. (C) Same as Fig. 2D, except recombinant NSF<sub>Ch07</sub> or NSF<sub>RAN07</sub> bound *in vitro* by no- $\alpha$ -SNAP (D,E). Silver-stained SDS-PAGE showing amount of NSF<sub>Ch07</sub>, NSF<sub>RAN07</sub> or mutants of either ("NSF Mut.", "RAN Mut.") bound to constant amount of *Rhg1*  $\alpha$ -SNAPs, including  $\alpha$ -SNAP<sub>Rhg1</sub> LC 286<sub>AAAA</sub> 289 ("LC Mut."), which has alanine substitutions at the *Rhg1* polymorphisms. NSF Mut. is NSF<sub>Ch07</sub> N<sub>21</sub>A F<sub>115</sub>A; RAN Mut. is NSF<sub>RAN07</sub> Y<sub>21</sub>N F<sub>116</sub> $\wedge$ . WT, HC or LC refers to  $\alpha$ -SNAP<sub>Rhg1</sub> WT,  $\alpha$ -SNAP<sub>Rhg1</sub> HC or  $\alpha$ -SNAP<sub>Rhg1</sub> LC, while "None" is a no  $\alpha$ -SNAP negative binding control. Entirely independent replicate binding experiments were performed as in C, D and E with similar results.

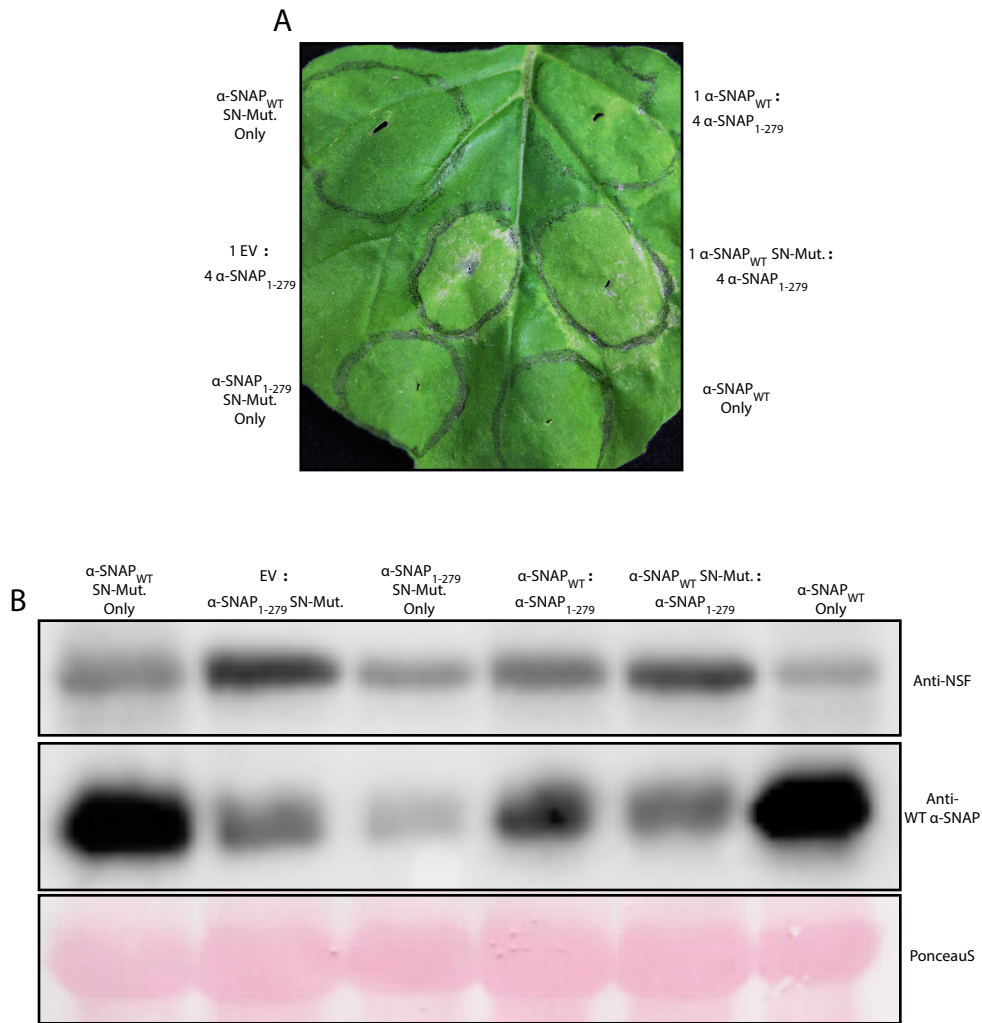

Fig. S5. Soybean WT  $\alpha$ -SNAPs mutated at residues known in other  $\alpha$ -SNAPs to promote SNARE-bundle interactions are deficient in rescuing the *N. benthamiana* cell death induced by toxic  $\alpha$ -SNAP types, and  $\alpha$ -SNAP<sub>1-279</sub> (which lacks the final 10 C-terminal residues and induces *N. benthamiana* cell death) becomes unable to cause cell death when mutated at the same SNARE-bundle interaction residues. (A) Representative *N. benthamiana* leaf infiltrated with individual or mixed *Agrobacterium* cultures expressing the indicated  $\alpha$ -SNAP constructs. The  $\alpha$ -SNAP SNARE-bundle interaction mutant ("SN-Mut.") is K<sub>193</sub>E R<sub>230</sub>E, as described in Zhao *et al* (3).  $\alpha$ -SNAP<sub>WT</sub> is the WT (SCN-susceptible Williams 82) chromosome 18  $\alpha$ -SNAP<sub>Rhg1</sub> WT. (B) Immunoblot of total WT  $\alpha$ -SNAP or NSF proteins in *N. benthamiana* leaves expressing only the indicated solo proteins, or construct mixes. PonceauS staining indicates similar levels of total protein loading.

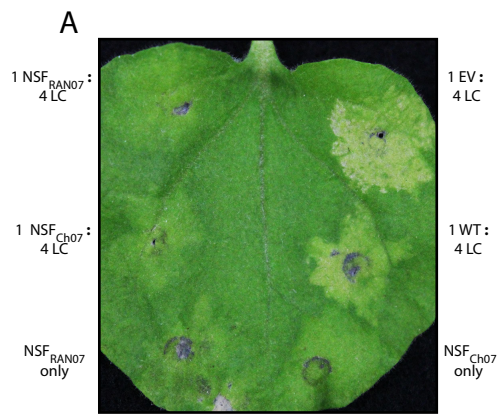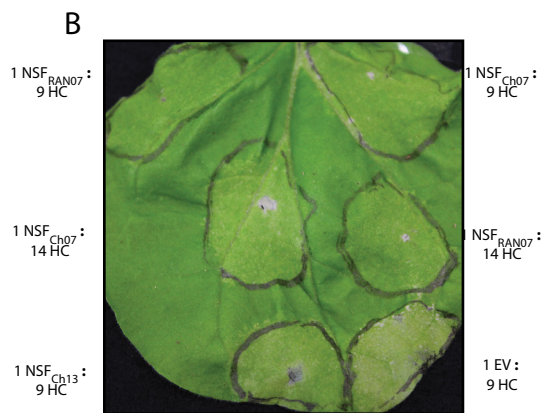

Fig. S6. Coexpression of soybean NSFs reduces cell-death symptoms caused by *Rhg1* resistance  $\alpha$ -SNAPs; NSF<sub>RAN07</sub> gives strongest protection. (A) *N. benthamiana* leaves ~6 days post agro-infiltration with 1:4 mixed cultures of NSF<sub>Ch07</sub> or NSF<sub>RAN07</sub> or  $\alpha$ -SNAP<sub>Rhg1</sub> WT or empty vector to  $\alpha$ -SNAP<sub>Rhg1</sub> LC (four parts *Agrobacterium* delivering  $\alpha$ -SNAP<sub>Rhg1</sub> LC to one part *Agrobacterium* delivering a soybean NSF, or  $\alpha$ -SNAP<sub>Rhg1</sub> WT or empty vector control). (B) Like Fig. 3A, but using  $\alpha$ -SNAP<sub>Rhg1</sub> HC instead of  $\alpha$ -SNAP<sub>Rhg1</sub> LC in the corresponding mixture cultures of NSF<sub>Ch07</sub> or NSF<sub>RAN07</sub> or empty vector.





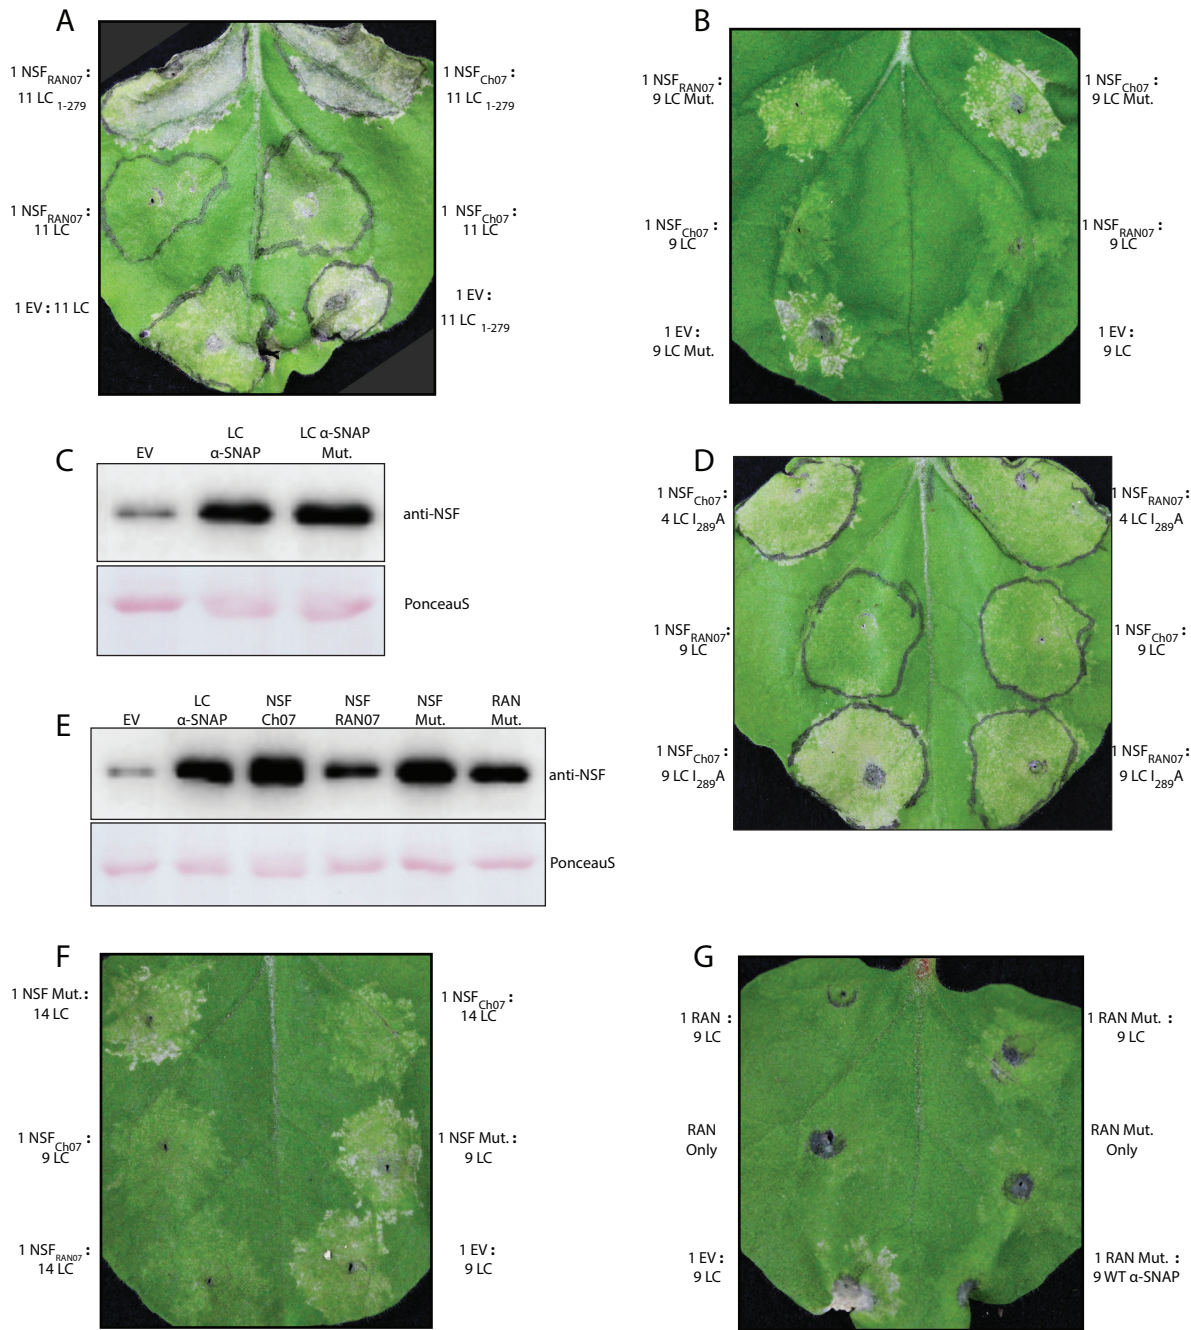

Fig. S8. Coexpression of soybean NSFs reduces cell-death symptoms caused by *Rhg1* resistance-type  $\alpha$ -SNAPs; changes to the polymorphic  $\alpha$ -SNAP<sub>*Rhg1*</sub> LC C-terminus reduce cell death protection, as do site-directed mutations at implicated NSF residues. (A) Like Fig. 3A, *N. benthamiana* leaves ~6 days post agro-infiltration but with an 11:1 mixed culture of  $\alpha$ -SNAP<sub>*Rhg1*</sub> LC or  $\alpha$ -SNAP<sub>*Rhg1*</sub> LC<sub>1-279</sub> (lacks the final C-terminal residues) co-expressed with NSF<sub>Ch07</sub> or NSF<sub>RAN07</sub> or empty vector. (B) A 9:1 mixed culture of  $\alpha$ -SNAP<sub>*Rhg1*</sub> LC or  $\alpha$ -SNAP<sub>*Rhg1*</sub> LC 286<sub>AAAA</sub> 289 ("LC Mut.") co-expressed with NSF<sub>Ch07</sub> or NSF<sub>RAN07</sub> or empty vector. (C) Immunoblot of total NSF protein expression from *N. benthamiana* leaves expressing empty vector (EV),  $\alpha$ -SNAP<sub>*Rhg1*</sub> LC or  $\alpha$ -SNAP<sub>*Rhg1*</sub> LC 286<sub>AAAA</sub> 289 (LC Mut.). PonceauS staining indicates similar loading of total proteins. (D) Like A and B, but 4:1 or 9:1 mixed cultures of  $\alpha$ -SNAP<sub>*Rhg1*</sub> LC or  $\alpha$ -SNAP<sub>*Rhg1*</sub> LC-I<sub>289</sub>A co-expressed with NSF<sub>Ch07</sub> or NSF<sub>RAN07</sub>. (E) Immunoblot of total NSF protein expression from *N. benthamiana* leaf tissues expressing empty vector (EV),  $\alpha$ -SNAP<sub>*Rhg1*</sub> LC, or the indicated NSF constructs. PonceauS staining indicates similar loading of total proteins. (F) A 9:1 mixed culture of  $\alpha$ -SNAP<sub>*Rhg1*</sub> LC co-expressed with either EV, NSF<sub>Ch07</sub>, or NSF<sub>RAN07</sub> or NSF<sub>Ch07</sub> N<sub>21</sub> A F<sub>115</sub> A (NSF Mut.). (G) A 9:1 mixed culture of  $\alpha$ -SNAP<sub>*Rhg1*</sub> LC co-expressed with either EV, NSF<sub>RAN07</sub> or NSF<sub>RAN07</sub> Y<sub>21</sub> N F<sub>116</sub> A (RAN Mut.).

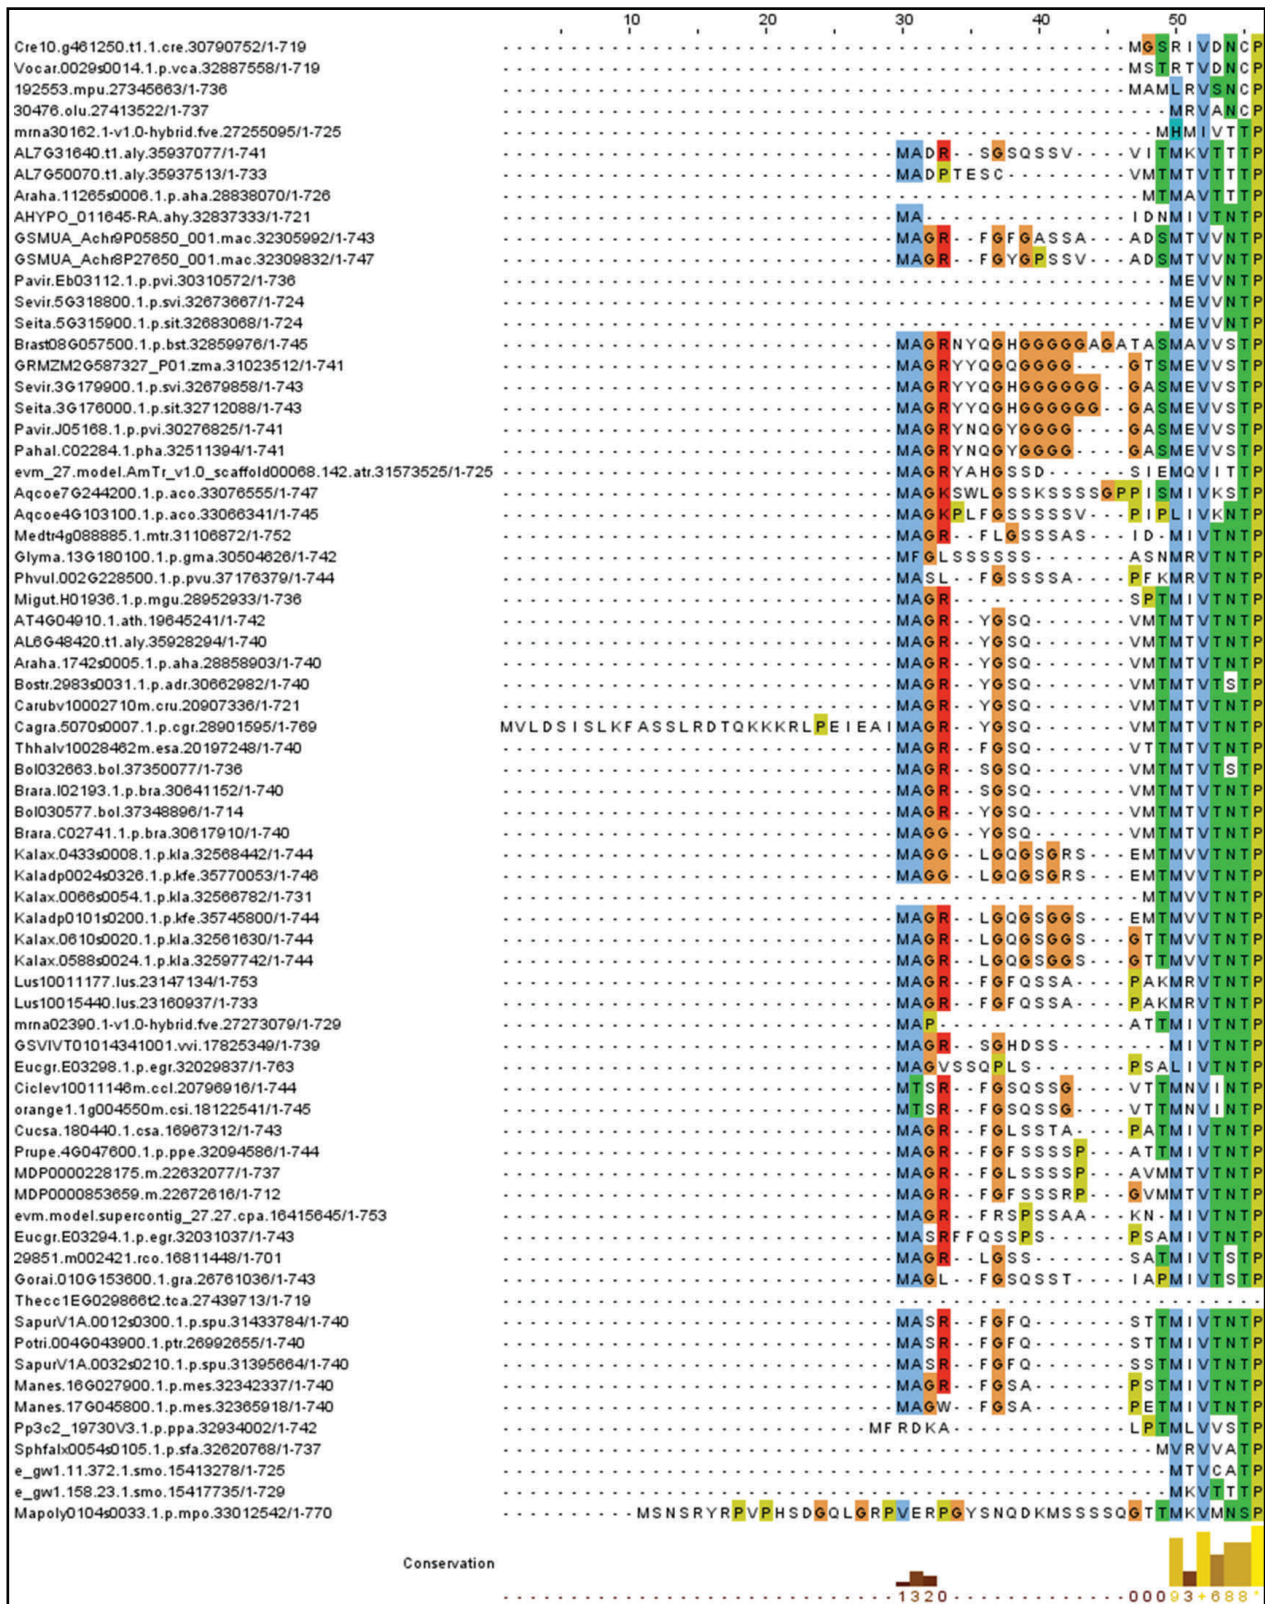

Fig. S9. Alignment of available plant NSF sequences starting at predicted residue 1. General consensus of  $R_4$  is observed across a majority of plant species. Alignment generated with Jalview using all available angiosperm NSF sequences from Phytozome.org (2). Only NSF sequences of residue lengths comparable to known NSF sequences (~700-800 residues) were used for the alignment.

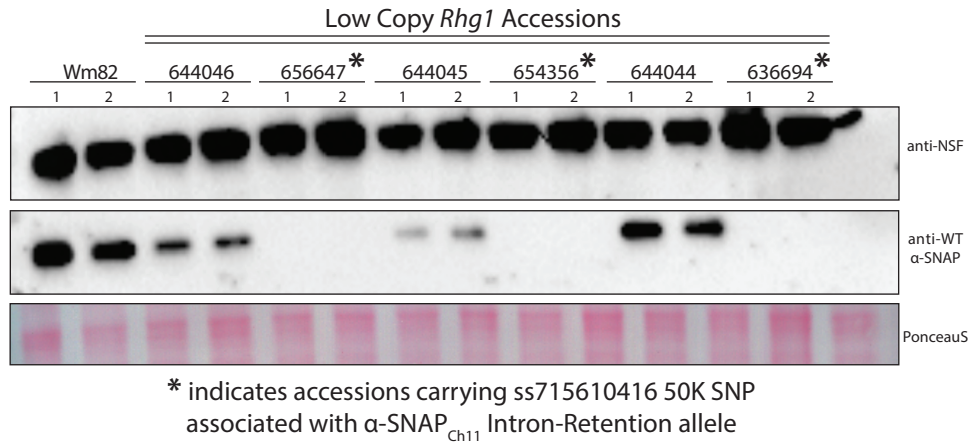

Fig. S10. Low copy *Rhg1* varieties carrying ss715610416 SNP associated with Ch11  $\alpha$ -SNAP-Intron Retention (IR) allele have lower WT  $\alpha$ -SNAP abundance. (A) Immunoblots for WT  $\alpha$ -SNAP and NSF of Wm 82 or of low copy *Rhg1* accessions PI 644046, PI 656647, PI 644045 PI 654356, PI 636694, which are positive (\*) or negative for the ss715610416 SNP associated with the  $\alpha$ -SNAP<sub>Ch11</sub>-IR allele. PonceauS indicates relative total protein abundance per each line.

| Soybean Accession | <i>Rhg1</i> Copy # | SCN Resistant | <i>Rhg1</i> WT α-SNAP | <i>Rhg1</i> HC α-SNAP | <i>Rhg1</i> LC α-SNAP | Ch11 WT α-SNAP | Ch11 I.R. α-SNAP | Ch07 NSF WT | Ch07 NSF RAN07 |
|-------------------|--------------------|---------------|-----------------------|-----------------------|-----------------------|----------------|------------------|-------------|----------------|
| Williams 82       | 1                  | —             | ✓                     | —                     | —                     | ✓              | —                | ✓           | —              |
| PI 548402         | 3                  | ✓             | —                     | —                     | ✓                     | —              | ✓                | —           | ✓              |
| PI 90763          | 3                  | ✓             | —                     | —                     | ✓                     | —              | ✓                | —           | ✓              |
| PI 437654         | 3                  | ✓             | —                     | —                     | ✓                     | —              | ✓                | —           | ✓              |
| PI 89772          | 3                  | ✓             | —                     | —                     | ✓                     | —              | ✓                | —           | ✓              |
| PI 548316         | 7                  | ✓             | ✓                     | ✓                     | —                     | —              | ✓                | —           | ✓              |
| PI 88788          | 9                  | ✓             | ✓                     | ✓                     | —                     | ✓              | —                | —           | ✓              |
| PI 209332         | 10                 | ✓             | ✓                     | ✓                     | —                     | ✓              | —                | —           | ✓              |

Table S1. *Rhg1* copy number and relevant α-SNAP and NSF alleles present in Wm82 or in the SCN-resistance phenotyping “HG-Type” soybeans. *Rhg1* haplotypes color coded: blue (WT, Single Copy *Rhg1*), red (LC, Low Copy *Rhg1*) or orange (HC, High Copy *Rhg1*). A grey checkmark indicates presence of certain trait or allele and a black minus sign denotes absence. WT is Wild-type allele, I.R. is intron-retention allele of Ch11 α-SNAP (*Glyma.11G234500*) and RAN07 is *Rhg1* associated NSF on Ch07 allele of *Glyma.07G195900*.

| Line              | <i>Rhg1</i> Haplotype     | NSF <sub>Ch07</sub>       | NSF <sub>Ch13</sub> | $\alpha$ -SNAP <sub>Ch11</sub> |
|-------------------|---------------------------|---------------------------|---------------------|--------------------------------|
| <b>Peking</b>     | <i>Rhg1</i> <sub>LC</sub> | <i>Rhg1</i> Assoc. Allele | WT (Wm82-type)      | Intron Retention               |
| <b>90763</b>      | <i>Rhg1</i> <sub>LC</sub> | <i>Rhg1</i> Assoc. Allele | V555I               | Intron Retention               |
| <b>437654</b>     | <i>Rhg1</i> <sub>LC</sub> | <i>Rhg1</i> Assoc. Allele | WT (Wm82-type)      | Intron Retention               |
| <b>209332</b>     | <i>Rhg1</i> <sub>HC</sub> | <i>Rhg1</i> Assoc. Allele | V555I               | WT                             |
| <b>89772</b>      | <i>Rhg1</i> <sub>LC</sub> | <i>Rhg1</i> Assoc. Allele | V555I               | Intron Retention               |
| <b>548316</b>     | <i>Rhg1</i> <sub>HC</sub> | <i>Rhg1</i> Assoc. Allele | V555I               | Intron Retention               |
| <b>Prohio</b>     | Susceptible               | WT (Wm82-type)            | V555I               | WT                             |
| <b>NE3001</b>     | Susceptible               | WT (Wm82-type)            | Y260F               | WT                             |
| <b>4J105-34</b>   | <i>Rhg1</i> <sub>HC</sub> | <i>Rhg1</i> Assoc. Allele | V555I, L738F        | WT                             |
| <b>CLOJ095-46</b> | <i>Rhg1</i> <sub>HC</sub> | <i>Rhg1</i> Assoc. Allele | V555I               | WT                             |
| <b>IA3023</b>     | Susceptible               | WT (Wm82-type)            | V555I               | WT                             |
| <b>LD00-3309</b>  | <i>Rhg1</i> <sub>HC</sub> | <i>Rhg1</i> Assoc. Allele | WT (Wm82-type)      | WT                             |
| <b>LD02-4485</b>  | <i>Rhg1</i> <sub>HC</sub> | <i>Rhg1</i> Assoc. Allele | WT (Wm82-type)      | WT                             |
| <b>LG05-4292</b>  | <i>Rhg1</i> <sub>HC</sub> | <i>Rhg1</i> Assoc. Allele | WT (Wm82-type)      | Intron Retention               |
| <b>LD01-5907</b>  | <i>Rhg1</i> <sub>LC</sub> | <i>Rhg1</i> Assoc. Allele | V555I               | Intron Retention               |
| <b>LD02-9050</b>  | <i>Rhg1</i> <sub>HC</sub> | <i>Rhg1</i> Assoc. Allele | V555I               | WT                             |
| <b>Magellan</b>   | Susceptible               | WT (Wm82-type)            | WT (Wm82-type)      | WT                             |
| <b>Maverick</b>   | <i>Rhg1</i> <sub>HC</sub> | <i>Rhg1</i> Assoc. Allele | V555I               | Intron Retention               |

Table S2.  $\alpha$ -SNAP or NSF alleles identified by whole genome sequencing of HG-Type test lines and *Rhg1*-containing NAM parents. All multi-copy *Rhg1* haplotype lines contained a unique *Glyma.07g195900* NSF<sub>Ch07</sub> allele (*Rhg1* associated NSF on chromosome 07; NSF<sub>RAN07</sub>). An  $\alpha$ -SNAP<sub>Ch11</sub> intron-retention allele was present among some, but not all multi-copy *Rhg1* haplotypes. A *Glyma.13G180100* (NSF<sub>Ch13</sub>) allele was also detected in some but not all *Rhg1* containing HG-Type and NAM lines, but was also found in some SCN-susceptible varieties.

| ss715597431  |                                                                                                |                                                         |                                                                                                                                                                                  |                      |                      |                     |                     |                                      |                        |
|--------------|------------------------------------------------------------------------------------------------|---------------------------------------------------------|----------------------------------------------------------------------------------------------------------------------------------------------------------------------------------|----------------------|----------------------|---------------------|---------------------|--------------------------------------|------------------------|
| Soybean Line | GLYma.07g195900                                                                                | GLYma.07g195800                                         | GLYma.07g195700                                                                                                                                                                  | GLYma.07g195600      | GLYma.07g195500      | GLYma.07g195400     | GLYma.07g195300     | GLYma.07g195200                      | GLYma.07g195100        |
|              | NSF (RAN07)                                                                                    | Rubber Elongation Factor                                | DNA Mismatch Repair MutS2                                                                                                                                                        | No annotated domains | TFII H Polypeptide 4 | E3 Ubiquitin Ligase | Asparagine Synthase | Uncharacterized Conserved Protein    | LRR Containing Protein |
| PI 548402    | R <sub>4</sub> Q, N <sub>21</sub> Y, S <sub>25</sub> N, A <sub>116</sub> F, M <sub>181</sub> I | K <sub>3</sub> N, F <sub>137</sub> S                    | T <sub>21</sub> A, K <sub>23</sub> R, G <sub>109</sub> C, H <sub>115</sub> Q, V <sub>345</sub> I, D <sub>364</sub> N, M <sub>406</sub> T, Q <sub>618</sub> K                     | WT                   | WT                   | WT                  | WT                  | WT                                   | WT                     |
| PI 90763     | R <sub>4</sub> Q, N <sub>21</sub> Y, S <sub>25</sub> N, A <sub>116</sub> F, M <sub>181</sub> I | K <sub>3</sub> N, L <sub>42</sub> R, F <sub>137</sub> S | T <sub>21</sub> A, K <sub>23</sub> R, G <sub>109</sub> C, H <sub>115</sub> Q, V <sub>345</sub> I, D <sub>364</sub> N, M <sub>406</sub> T, Q <sub>618</sub> K                     | WT                   | WT                   | WT                  | WT                  | WT                                   | WT                     |
| PI 437654    | R <sub>4</sub> Q, N <sub>21</sub> Y, S <sub>25</sub> N, A <sub>116</sub> F, M <sub>181</sub> I | K <sub>3</sub> N, F <sub>137</sub> S                    | T <sub>21</sub> A, K <sub>23</sub> R, G <sub>109</sub> C, H <sub>115</sub> Q, V <sub>345</sub> I, D <sub>364</sub> N, M <sub>406</sub> T, Q <sub>618</sub> K                     | WT                   | WT                   | WT                  | WT                  | WT                                   | WT                     |
| PI 209332    | R <sub>4</sub> Q, N <sub>21</sub> Y, S <sub>25</sub> N, A <sub>116</sub> F, M <sub>181</sub> I | K <sub>3</sub> N, L <sub>42</sub> R, F <sub>137</sub> S | T <sub>21</sub> A, K <sub>23</sub> R, V <sub>345</sub> I, D <sub>364</sub> N, M <sub>406</sub> T, Q <sub>618</sub> K                                                             | WT                   | WT                   | WT                  | WT                  | WT                                   | WT                     |
| PI 89772     | R <sub>4</sub> Q, N <sub>21</sub> Y, S <sub>25</sub> N, A <sub>116</sub> F, M <sub>181</sub> I | K <sub>3</sub> N, F <sub>137</sub> S                    | T <sub>21</sub> A, K <sub>23</sub> R, G <sub>109</sub> C, H <sub>115</sub> Q, V <sub>345</sub> I, D <sub>364</sub> N, M <sub>406</sub> T, Q <sub>618</sub> K                     | WT                   | WT                   | WT                  | WT                  | WT                                   | WT                     |
| PI 548316    | R <sub>4</sub> Q, N <sub>21</sub> Y, S <sub>25</sub> N, A <sub>116</sub> F, M <sub>181</sub> I | K <sub>3</sub> N, F <sub>137</sub> S                    | T <sub>21</sub> A, K <sub>23</sub> R, G <sub>109</sub> C, H <sub>115</sub> Q, V <sub>345</sub> I, D <sub>364</sub> N, M <sub>406</sub> T, Q <sub>618</sub> K                     | WT                   | WT                   | WT                  | WT                  | WT                                   | WT                     |
| Magellan     | WT                                                                                             | L <sub>42</sub> R, F <sub>137</sub> S                   | D <sub>364</sub> N, M <sub>406</sub> T                                                                                                                                           | WT                   | WT                   | WT                  | E <sub>49</sub> G   | D <sub>60</sub> S, S <sub>64</sub> P | WT                     |
| IA3023       | WT                                                                                             | L <sub>42</sub> R, F <sub>137</sub> S                   | D <sub>364</sub> N, M <sub>406</sub> T, Y <sub>576</sub> F                                                                                                                       | WT                   | WT                   | WT                  | E <sub>49</sub> G   | D <sub>60</sub> A, S <sub>64</sub> P | WT                     |
| LD00-3309    | R <sub>4</sub> Q, N <sub>21</sub> Y, S <sub>25</sub> N, A <sub>116</sub> F, M <sub>181</sub> I | K <sub>3</sub> N, L <sub>42</sub> R, F <sub>137</sub> S | T <sub>21</sub> A, K <sub>23</sub> R, G <sub>109</sub> C, H <sub>115</sub> Q, V <sub>345</sub> I, D <sub>364</sub> N, M <sub>406</sub> T, G <sub>516</sub> C, Q <sub>618</sub> K | WT                   | WT                   | WT                  | WT                  | WT                                   | WT                     |
| CLO1095-4-6  | R <sub>4</sub> Q, N <sub>21</sub> Y, S <sub>25</sub> N, A <sub>116</sub> F, M <sub>181</sub> I | K <sub>3</sub> N, L <sub>42</sub> R, F <sub>137</sub> S | T <sub>21</sub> A, K <sub>23</sub> R, G <sub>109</sub> C, H <sub>115</sub> Q, V <sub>345</sub> I, D <sub>364</sub> N, M <sub>406</sub> T, Q <sub>618</sub> K                     | WT                   | WT                   | WT                  | WT                  | WT                                   | WT                     |
| Maverick     | R <sub>4</sub> Q, N <sub>21</sub> Y, S <sub>25</sub> N, A <sub>116</sub> F, M <sub>181</sub> I | K <sub>3</sub> N, F <sub>137</sub> S                    | T <sub>21</sub> A, K <sub>23</sub> R, G <sub>109</sub> C, H <sub>115</sub> Q, V <sub>345</sub> I, D <sub>364</sub> N, M <sub>406</sub> T, Q <sub>618</sub> K                     | WT                   | WT                   | WT                  | WT                  | WT                                   | WT                     |

Table S3. Amino acid polymorphisms of genes within the chromosome 07 interval co-segregating with *Rhg1*. Polymorphisms are relative to predicted residues of the Williams82 (SCN-susceptible) reference genome. The predicted amino acid sequence of most candidate loci matches Wm82. Among candidate loci with residue substitutions, only the *NSF RAN07* allele has identical amino acid changes consistent across all *Rhg1*-containing germplasm. SCN-susceptible soybean varieties highlighted in green.

| Diverse Parent     | <u>RR</u> / <u>RR</u> (Ch07/Ch18) | <u>RR</u> / <u>SS</u> (Ch07/Ch18) | <u>SS</u> / <u>RR</u> (Ch07/Ch18) | <u>SS</u> / <u>SS</u> (Ch07/Ch18) |
|--------------------|-----------------------------------|-----------------------------------|-----------------------------------|-----------------------------------|
| <b>4J105-3-4</b>   | 41                                | 41                                | 2                                 | 31                                |
| <b>CLOJ095-4-6</b> | 35                                | 45                                | 0                                 | 37                                |
| <b>LD00-3309</b>   | 38                                | 45                                | 1                                 | 27                                |
| <b>LD01-5907</b>   | 32                                | 32                                | 1                                 | 42                                |
| <b>LD02-4485</b>   | 37                                | 50                                | 1                                 | 28                                |
| <b>LD02-9050</b>   | 43                                | 31                                | 2                                 | 34                                |
| <b>Maverick</b>    | 31                                | 34                                | 0                                 | 41                                |
| <b>LG05-4292</b>   | 44                                | 41                                | 1                                 | 30                                |
| <b>Totals</b>      | <u>301</u>                        | <u>319</u>                        | <u>8*</u>                         | <u>270</u>                        |

**R** refers to allele from *Rhg1* resistant parent.

**S** refers to allele from SCN-susceptible parent

Genotype order: first allele is chr 7 (RAN07 interval) and second is chr 18 (*Rhg1* interval)

\*All 8 re-examined RILs that inherited *Rhg1<sub>HC</sub>* or *Rhg1<sub>LC</sub>* also inherited the *NSF<sub>RAN07</sub>* ^116 F and M<sub>181</sub>I mutations meaning that all 309 RILs that carried the resistance associated *Rhg1* also carried *NSF<sub>RAN07</sub>*

Table S4. *NSF<sub>RAN07</sub>* co-segregates with *Rhg1* in all *Rhg1*-containing F2:5 offspring derived from *Rhg1*<sup>+</sup> X *rhg1*<sup>-</sup> parental crosses. Segregating lines and 6K SoySNP genotyping were developed and performed in the soybean NAM (nested association mapping) project of Song *et al.*, 2017 (4).



## Supporting Information

### Bayless *et al.* "An atypical NSF (N-ethylmaleimide Sensitive Factor) enables the viability of nematode-resistant *Rhg1* soybeans"

#### SI Materials & Methods

##### Recombinant Protein Production

Vectors encoding recombinant  $\alpha$ -SNAP<sub>Rhg1</sub>HC,  $\alpha$ -SNAP<sub>Rhg1</sub>LC,  $\alpha$ -SNAP<sub>Rhg1</sub>WT,  $\alpha$ -SNAP<sub>Rhg1</sub>WT<sub>1-279</sub> and the WT alleles of NSF *Glyma.07G195900* (NSF<sub>Ch07</sub>) and *Glyma.13G180100* (NSF<sub>Ch13</sub>) were generated in Bayless *et al.*, 2016. The open reading frames (ORFs) encoding the soybean NSFRAN07 allele of *Glyma.07G195900* or *N.benthamiana* NSF were cloned into the expression vector pRham N-His-SUMO according to manufacturer instructions (Lucigen). Recombinant  $\alpha$ -SNAP and NSF proteins were also produced and purified as in Bayless *et al.* 2016. All expression constructs were chemically transformed into the expression strain "E. cloni 10G" (Lucigen), grown to OD<sub>600</sub> ~0.60-0.70, and induced with 0.2% L-Rhamnose (Sigma) for either 8 hr at 37°C or overnight at 28°C. Soluble, native recombinant His-SUMO- $\alpha$ -SNAPs or His-SUMO-NSF proteins were purified with PerfectPro Ni-NTA resin (5 PRIME), with similar procedures as described in (5) and eluted with imidazole, though no subsequent gel filtration steps were performed. Following the elution of the His-SUMO-fusion proteins, overnight dialysis was performed at 4 °C in 20 mM Tris (pH 8.0), 150 mM NaCl, 10% (vol/vol) glycerol, and 1.5 mM Tris (2-carboxyethyl)-phosphine. The His-SUMO affinity/solubility tags were cleaved from  $\alpha$ -SNAP or NSF using 1 or 2 units of SUMO Express protease (Lucigen) and separated by rebinding of the tag with Ni-NTA resin and collecting the recombinant protein from the flow-through. Recombinant protein purity was assessed by Coomassie blue staining and quantified via a spectrophotometer.

##### *In vitro* NSF- $\alpha$ -SNAP Binding Assays

*In vitro* NSF binding assays were performed essentially as described in (5, 6). Briefly, 20  $\mu$ g of each respective recombinant  $\alpha$ -SNAP protein was added to the bottom of a 1.5-mL polypropylene tube and incubated at 25°C for 20 min. Unbound  $\alpha$ -SNAP proteins were then washed by adding  $\alpha$ -SNAP wash buffer [25 mM Tris, pH 7.4, 50 mM KCl, 1 mM DTT, 0.1 mg/mL bovine serum albumin (BSA)]. After removal of wash buffer, 20  $\mu$ g of recombinant NSF (1  $\mu$ g/ $\mu$ L in NSF binding buffer), was then immediately added and incubated on ice for 10 min. The solution was then removed and samples were immediately washed 2X with NBB to remove any unbound NSF. Samples were then boiled in 1X SDS loading buffer and separated on a 10% Bis-Tris SDS-PAGE, and silver-stained using the ProteoSilver Kit (Sigma-Aldrich), according to the manufacturer directions. The percentage of NSF bound by  $\alpha$ -SNAP was then calculated using densitometric analysis with ImageJ.

##### Antibody Production and Validation

Affinity-purified polyclonal rabbit antibodies raised against  $\alpha$ -SNAP<sub>Rhg1</sub>HC,  $\alpha$ -SNAP<sub>Rhg1</sub>LC and wild-type  $\alpha$ -SNAPs were previously generated and validated using recombinant proteins in

Bayless 2016. The epitopes for these custom antibodies are the final six or seven C-terminal  $\alpha$ -SNAP residues: “EEDDLT,” “EQHEAIT,” or “EEYEVIT” for wild-type, high-, or low-copy  $\alpha$ -SNAPs, respectively. For NSF, a synthetic peptide, “ETEKNVRDLFADAEQDQRTRGDESD,” corresponding to residues 300 to 324 of the *Glyma.07G195900* encoded protein was used. This same epitope is also present in *Glyma.13G180100* encoded NSF<sub>Ch13</sub> and this NSF antibody was also previously shown to be cross-reactive with the *N.benthamiana*-encoded NSF.

### Immunoblotting

Tissue preparation and immunoblots were performed essentially as in (5, 7). Soybean roots or *N. benthamiana* leaf tissues were flash-frozen in N<sub>2</sub>(L), massed, and homogenized in a PowerLyzer 24 (MO BIO) for three cycles of 15 seconds, with flash-freezing in-between each cycle. Protein extraction buffer [50 mM Tris·HCl (pH 7.5), 150 mM NaCl, 5 mM EDTA, 0.2% Triton X-100, 10% (vol/vol) glycerol, 1/100 Sigma protease inhibitor cocktail] was then added at a 3:1 volume to mass ratio and samples were centrifuged and stored on ice. In noted experiments, Bradford assays were performed on each sample, and equal OD amounts of total protein were loaded in each sample lane for SDS/PAGE. Immunoblots for either *Rhg1*  $\alpha$ -SNAP were incubated overnight at 4 °C in 5% (wt/vol) nonfat dry milk TBS-T (50 mM Tris, 150 mM NaCl, 0.05% Tween 20) at 1:1,000. NSF immunoblots were performed similarly, except incubations were for 1 h at room temperature. Secondary horseradish peroxidase-conjugated goat anti-rabbit IgG was added at 1:10,000 and incubated for 1 h at room temperature on a platform shaker, followed by four washes with TBS-T. Chemiluminescence detection was performed with SuperSignal West Pico or Dura chemiluminescent substrate (Thermo Scientific) and developed using a ChemiDoc MP chemiluminescent imager (Bio-Rad).

### Transgenic Soybean Root Generation

Binary expression constructs were transformed into *Agrobacterium rhizogenes* strain, “Arqua1”. Transgenic soybean roots were produced from cotyledons of the noted genetic background as described in (8).

**Transient *Agrobacterium* Expression in *Nicotiana benthamiana*.** *Agrobacterium tumefaciens* strain GV3101 was used for transient protein expression of all constructs via syringe-infiltration at OD<sub>600</sub> 0.60 for NSF constructs or OD<sub>600</sub> 0.80 for  $\alpha$ -SNAP constructs into young leaves of ~4-wk-old *N. benthamiana* plants. GV3101 cultures were grown overnight at 28°C in 25  $\mu$ g/mL kanamycin and rifampicin and induced for ~3.5 h in 10 mM Mes (pH 5.60), 10 mM MgCl<sub>2</sub>, and 100 $\mu$ M acetosyringone prior to leaf infiltration. *N. benthamiana* plants were grown in a Percival set at 25 °C with a photoperiod of 16 h light at 100  $\mu$ E·m<sup>-2</sup>·s<sup>-1</sup> and 8 h dark. For  $\alpha$ -SNAP complementation assays, GV3101 cultures were well-mixed with one volume of an empty vector control, or of the respective NSF construct immediately before co-infiltration. NSF<sub>RAN07</sub> or the *N. benthamiana* NSF were PCR amplified from a root cDNA library of *Rhg1*<sub>LC</sub> variety, “Forrest” or a *N. benthamiana* leaf cDNA library using KAPA HiFi polymerase, respectively. Expression cassettes for NSF<sub>N.benthamiana</sub>, NSF<sub>Ch13</sub>, NSF<sub>Ch07</sub> and NSF<sub>RAN07</sub> ORFs were directly assembled into a pBluescript vector containing the previously described soybean ubiquitin (GmUbi) promoter and NOS terminator using Gibson assembly (8). The NSF expression cassettes were then digested with the restriction enzymes NotI-Sall and ligated with T4 DNA

ligase into the previously described binary vector, pSM101-linker, which was cut with PspOMI-Sall restriction sites. The ORF encoding the  $\alpha$ -SNAP<sub>Ch11</sub> Intron-Retention (IR) allele was amplified with Kapa HiFi from a root cDNA library of *Rhg1*<sub>LC</sub> variety “Forrest” while the ORF encoding WT  $\alpha$ -SNAP<sub>Ch11</sub> was previously generated in (5). The ORFs encoding either  $\alpha$ -SNAP<sub>Ch11</sub> and  $\alpha$ -SNAP<sub>Ch11</sub>IR were Gibson assembled into a pBluescript vector containing a GmUbi-N-HA tag and NOS terminator, cut with PstI-XbaI and ligated into the binary vector, pSM101, cut with the same restriction pair. An 11.14 kb native genomic region encoding  $\alpha$ -SNAP<sub>Rhg1</sub>WT was amplified with Kapa HiFi from a previously described fosmid subclone (Fosmid 19) with AvrII-SbfI restriction ends, and then digested and ligated into the binary vector, pSM101, cut with XbaI-PstI. A 6.85 kb native locus encoding  $\alpha$ -SNAP<sub>Ch11</sub> was amplified from gDNA of Williams82 in two separate fragments (3.25 kb and 3.60 kb fragments) and Gibson assembled into the binary pSM101 vector cut with BamHI-PstI.

### Segregating NAM Crosses

Soybean parental crosses and 6K SNP genotyping mapping were developed and performed by (4).

### Protein Structure Modeling

NSF<sub>RAN07</sub>,  $\alpha$ -SNAP<sub>Ch11</sub> and  $\alpha$ -SNAP<sub>Ch11</sub>IR structural homology models were generated using SWISS-MODEL and the resulting PDB files were analyzed with PyMol (The PyMOL Molecular Graphics System, Version 1.8 Schrödinger, LLC). NSF<sub>RAN07</sub> was modeled to NSF<sub>CHO</sub> (*Cricetus griseus*, Chinese hamster ovary) (PDB 3j97.1) cryo-EM structure from Zhao *et al* (Brunger group). NSFs in many plants, including soybean, encode a variable length polyserine/glycine patch, starting at ~residue 6, hence modeling to NSF<sub>CHO</sub> began at residue 14. Primary amino acid sequence alignment indicated that residues N<sub>21</sub>, RR<sub>82-83</sub> and KK<sub>117-118</sub> in the soybean NSF N-domain and residues D<sub>208</sub>, DEED<sub>243-246</sub> and EEDD<sub>284-287</sub> in the  $\alpha$ -SNAP C-terminus correspond to NSF<sub>CHO</sub> (R<sub>10</sub>, RK<sub>67-68</sub>, KK<sub>104-105</sub>) and rat  $\alpha$ -SNAP (D<sub>217</sub>E<sub>249</sub>EE<sub>252-253</sub>, DEED<sub>290-293</sub>), respectively. 20S supercomplex modeling was also generated using PDB 3j97, with  $\alpha$ -SNAPs and SNARE complexes (VAMP-2, Syntaxin-1A, SNAP-25) of *Rattus norvegicus* origin (3).  $\alpha$ -SNAP<sub>Ch11</sub> and  $\alpha$ -SNAP<sub>Ch11</sub>IR were modeled to sec17 (yeast  $\alpha$ -SNAP) crystal structure 1QQE donated courtesy of Rice *et al* (Brunger group)(9).

### Sequence Logo and Alignments

The R<sub>4</sub>Q NSF amino acid consensus logo was generated using the first 10 NSF amino acids of the model eukaryotic organisms using WebLogo (10). The NSF amino acid sequences of these organisms were retrieved from publicly available sequence data at the National Center for Biotechnology Information (NCBI). Plant NSF sequences were obtained from Phytozome.org and aligned using Jalview (11).

### DNA Sequence and SNP Analysis

Whole-genome sequencing data of 12 soybean varieties was obtained from previously published studies (4, 12). Illumina sequencing reads were aligned to the Williams82 reference genome (Wm82.a2.v1) using BWA (version 0.7.12)(13). Reads were initially mapped using the

default settings of the *aln* command with the subsequent pairings performed with the *sampe* command. Alignments were next processed using the program Picard (version 2.9.0) to add read group information (AddOrReplaceReadGroups), mark PCR duplicates (MarkDuplicates, and merge alignments from separate sequencing runs (MergeSamFiles). The processed .bam files were then converted to vcf format using a combination of samtools (version 0.1.19) and bcftools (version 0.1.19). Finally, consensus sequences were generated from these .vcf files using the FastaAlternateReferenceMaker tool within GATK (version 3.7.0)(14).

### Oligonucleotide Primers

|                    |                                                                 |
|--------------------|-----------------------------------------------------------------|
| N. ben NSF Rev     | TCAATATCGAGCAATGTCCTGA                                          |
| N. ben NSF For     | ATGGCAGGGAGATTTGGTTCC                                           |
| N. ben Gmubi For   | GATTTATCTGTGATTGTTGACTCGACAGATGGCAGGGAGATTTGGTTCC               |
| N. ben NSF NOS Rev | GAAAGCTGGGTCTGAATTCGCCCTTTTCAATATCGAGCAATGTCCTGAAGGC            |
| N. ben pRham For   | CACCGCGAACAGATTGGAGGTGCAGGGAGATTTGGTTCC                         |
| N. ben pRham Rev   | GTGGCGGCCGCTCTATTATCAATATCGAGCAATGTCCTGA                        |
| NSF Ch07 UTR For   | GCCATTGCTATTGTGGTGC GA                                          |
| NSF Ch07 UTR Rev   | CTATCAGCACAACCAACAACACTG                                        |
| RAN07 Gmubi For    | GATTTATCTGTGATTGTTGACTCGACAGATGGCGAGTCAGTTCGGG                  |
| RAN07 NOS Rev      | AGCTGGGTCTGAATTCGCCCTTTTcATAACCTAACAAACATCCTGGAGGC              |
| RAN07 pRham For    | CTCACCGCGAACAGATTGGAGGTGCAGTCAGTTCGGGTTATCG                     |
| RAN07 pRham Rev    | CAGCGGTGGCGGCCGCTCTATTATAACCTAACAAACATCCTGGAGGC                 |
| RAN07 Detect For   | CTACACGCCCGCGAACGAC                                             |
| NSF07 Detect Rev   | CTCACTTGTACGGAATCACCGG                                          |
| WT NSF Detect For  | CAACACGCCCGCGAGCGAC                                             |
| NSF 13 UTR For     | GCCAAGAAACAGAGAAACATAGAGGC                                      |
| NSF 13 UTR Rev     | CTGAACAGTAACAAGCAATGTAGGAATG                                    |
| NSF 13 NOS Rev     | GAAAGCTGGGTCTGAATTCGCCCTTTTcATCTAACAAACATCCTGGAGGCAATC          |
| NSF 13 Gmubi For   | GATTTATCTGTGATTGTTGACTCGACAGATGTTCCGGCTTATCGTCTTCGTCTTCC<br>-TC |
| Ch11 Native 1 For  | CTAATCTGGGGACCTGGGTACCCGGGCTCGAACACGTATAAAGGACCTGAGG            |
| Ch11 Native 1 R    | GGATCAATATCTCGAAGCTGAATATGGGC                                   |
| Ch11 Native 2 For  | CCCATATTCAGCTTCGAGATATTGATCC                                    |
| Ch11 Native 2 Rev  | GGGCCACAGATATTAATTAAGACATCTGCAGCATCTCTCTTTATTTCCATG<br>-CACGCG  |
| Ch11 UTR For       | CGATCAATCCATCCATCTTCACTTGC                                      |
| Ch11 UTR Rev       | CAAACAATAGGTCCAACCGCCAG                                         |
| Ch18 Native For    | CCTGCAGGGAGCAGTAGGCTTCTTTGGAAGTTG                               |
| Ch18 Native Rev    | GTTTGCCACTTTAGGAACCCTAGG                                        |

## SI References

1. Severin AJ, *et al.* (2010) RNA-Seq Atlas of Glycine max: A guide to the soybean transcriptome. *BMC Plant Biology* 10(1):160.
2. Goodstein DM, *et al.* (2012) Phytozome: a comparative platform for green plant genomics. *Nucleic Acids Res* 40(Database issue):D1178-1186.
3. Zhao M, *et al.* (2015) Mechanistic insights into the recycling machine of the SNARE complex. *Nature* 518(7537):61-67.
4. Song Q, *et al.* (2017) Genetic Characterization of the Soybean Nested Association Mapping Population. *Plant Genome* 10(2).
5. Bayless AM, *et al.* (2016) Disease resistance through impairment of alpha-SNAP-NSF interaction and vesicular trafficking by soybean Rhg1. *Proc Natl Acad Sci U S A* 113(47):E7375-E7382.
6. Barnard RJ, Morgan A, & Burgoyne RD (1996) Domains of alpha-SNAP required for the stimulation of exocytosis and for N-ethylmaleimide-sensitive fusion protein (NSF) binding and activation. *Mol Biol Cell* 7(5):693-701.
7. Song J, Keppler BD, Wise RR, & Bent AF (2015) PARP2 Is the Predominant Poly(ADP-Ribose) Polymerase in Arabidopsis DNA Damage and Immune Responses. *PLoS genetics* 11(5):e1005200.
8. Cook DE, *et al.* (2012) Copy number variation of multiple genes at Rhg1 mediates nematode resistance in soybean. *Science* 338(6111):1206-1209.
9. Rice LM & Brunger AT (1999) Crystal structure of the vesicular transport protein Sec17: implications for SNAP function in SNARE complex disassembly. *Mol Cell* 4(1):85-95.
10. Crooks GE, Hon G, Chandonia JM, & Brenner SE (2004) WebLogo: a sequence logo generator. *Genome Res* 14(6):1188-1190.
11. Waterhouse AM, Procter JB, Martin DM, Clamp M, & Barton GJ (2009) Jalview Version 2 - a multiple sequence alignment editor and analysis workbench. *Bioinformatics* 25(9):1189-1191.
12. Cook DE, *et al.* (2014) Distinct Copy Number, Coding Sequence, and Locus Methylation Patterns Underlie Rhg1-Mediated Soybean Resistance to Soybean Cyst Nematode. *Plant Physiol* 165(2):630-647.
13. Li H & Durbin R (2009) Fast and accurate short read alignment with Burrows-Wheeler transform. *Bioinformatics* 25(14):1754-1760.
14. DePristo MA, *et al.* (2011) A framework for variation discovery and genotyping using next-generation DNA sequencing data. *Nat Genet* 43(5):491-498.
